# Supplementary material
Source: Research Square preprint supplement (doi:10.21203/rs.3.rs-8959949/v1)
Supplement: Supplementary file 1 [file 49a00054858a43a9120f8546.docx]

Supplementary Information


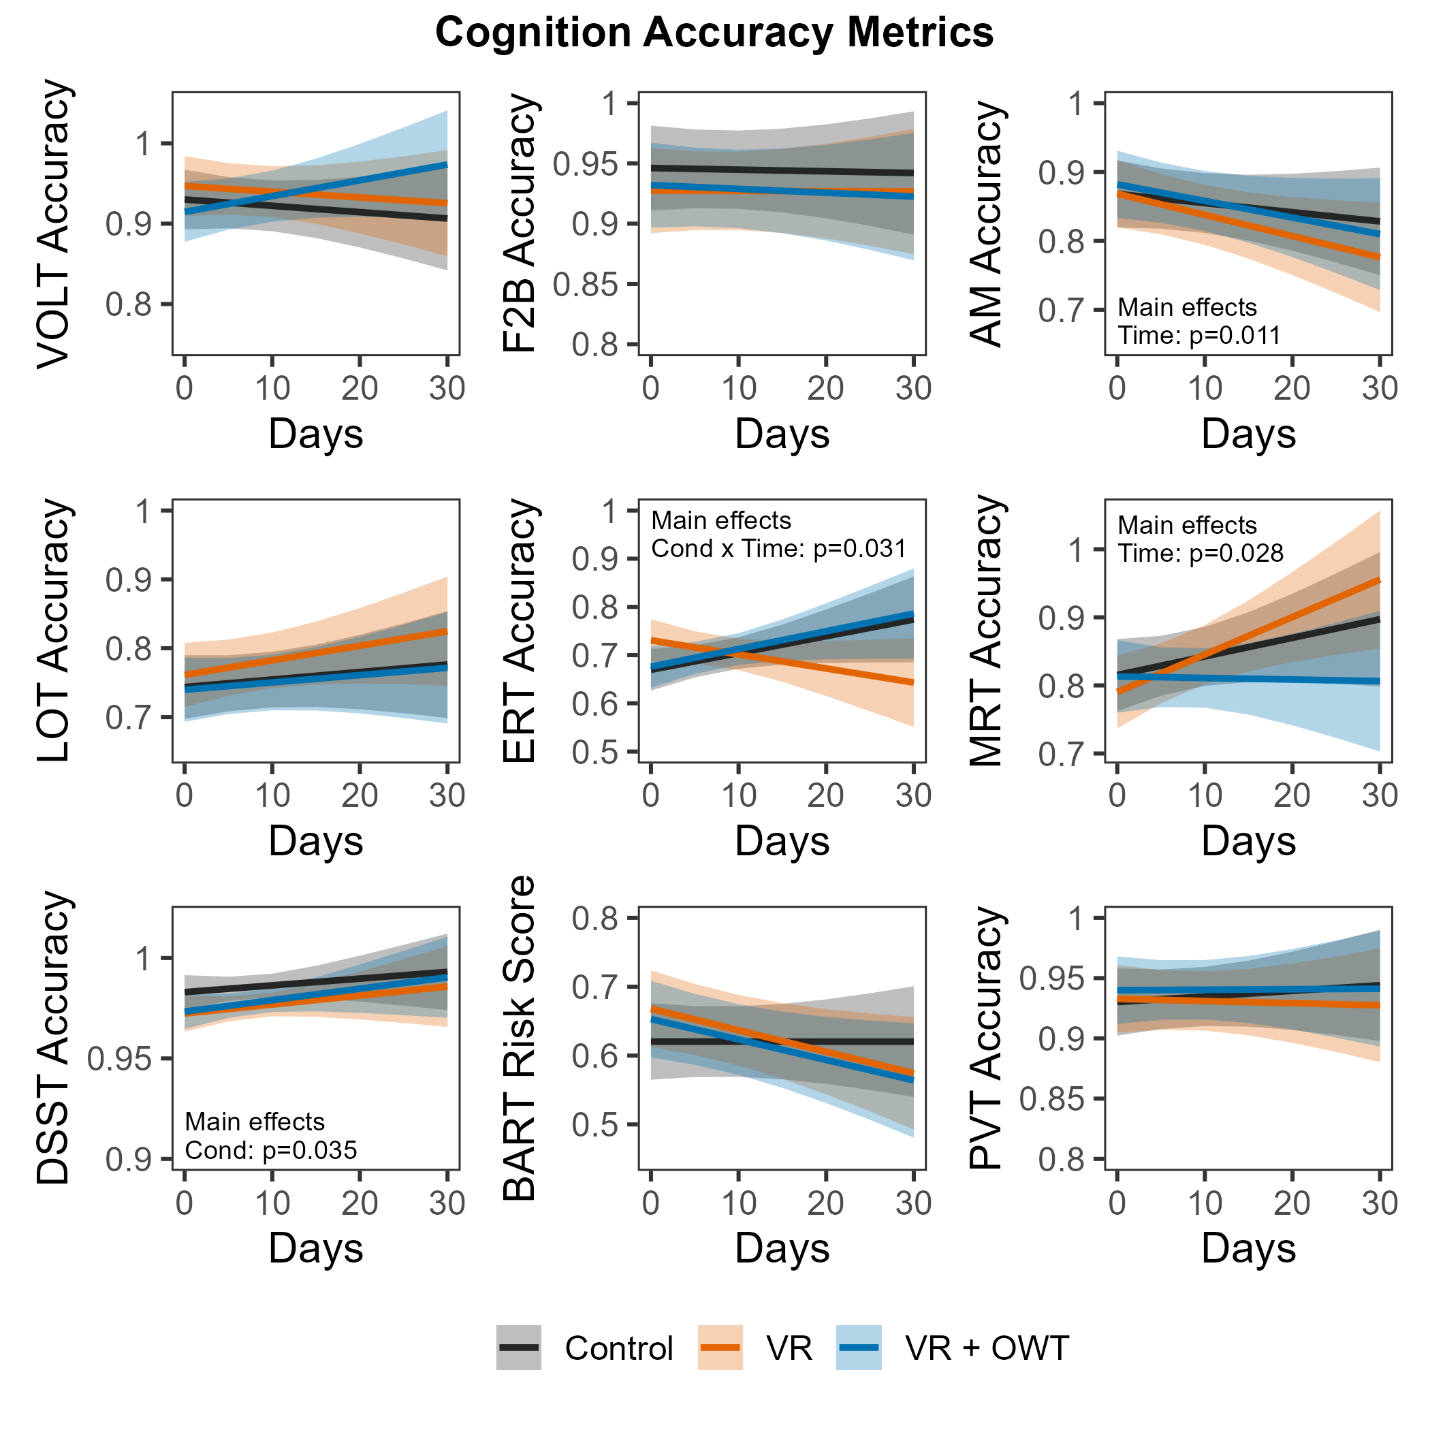


Supplementary Figure 1: Linear and robust linear mixed models for accuracy metrics on nine tasks in the Cognition battery. Models are presented as mean ± 95% confidence interval. Fixed factors included Time [numeric: days since T1], Condition [categorical: Control, VR, OVR], and their interaction. Subjects were included as random factors. VOLT: Visual Object Learning Test; F2B: Fractal 2-Back; AM: Abstract Matching; LOT: Line Orientation Test; ERT: Emotion Recognition Task; MRT: Matrix Reasoning Test; DSST: Digit Symbol Substitution Task; BART: Balloon Analog Risk Test; PVT: Psychomotor Vigilance Test.


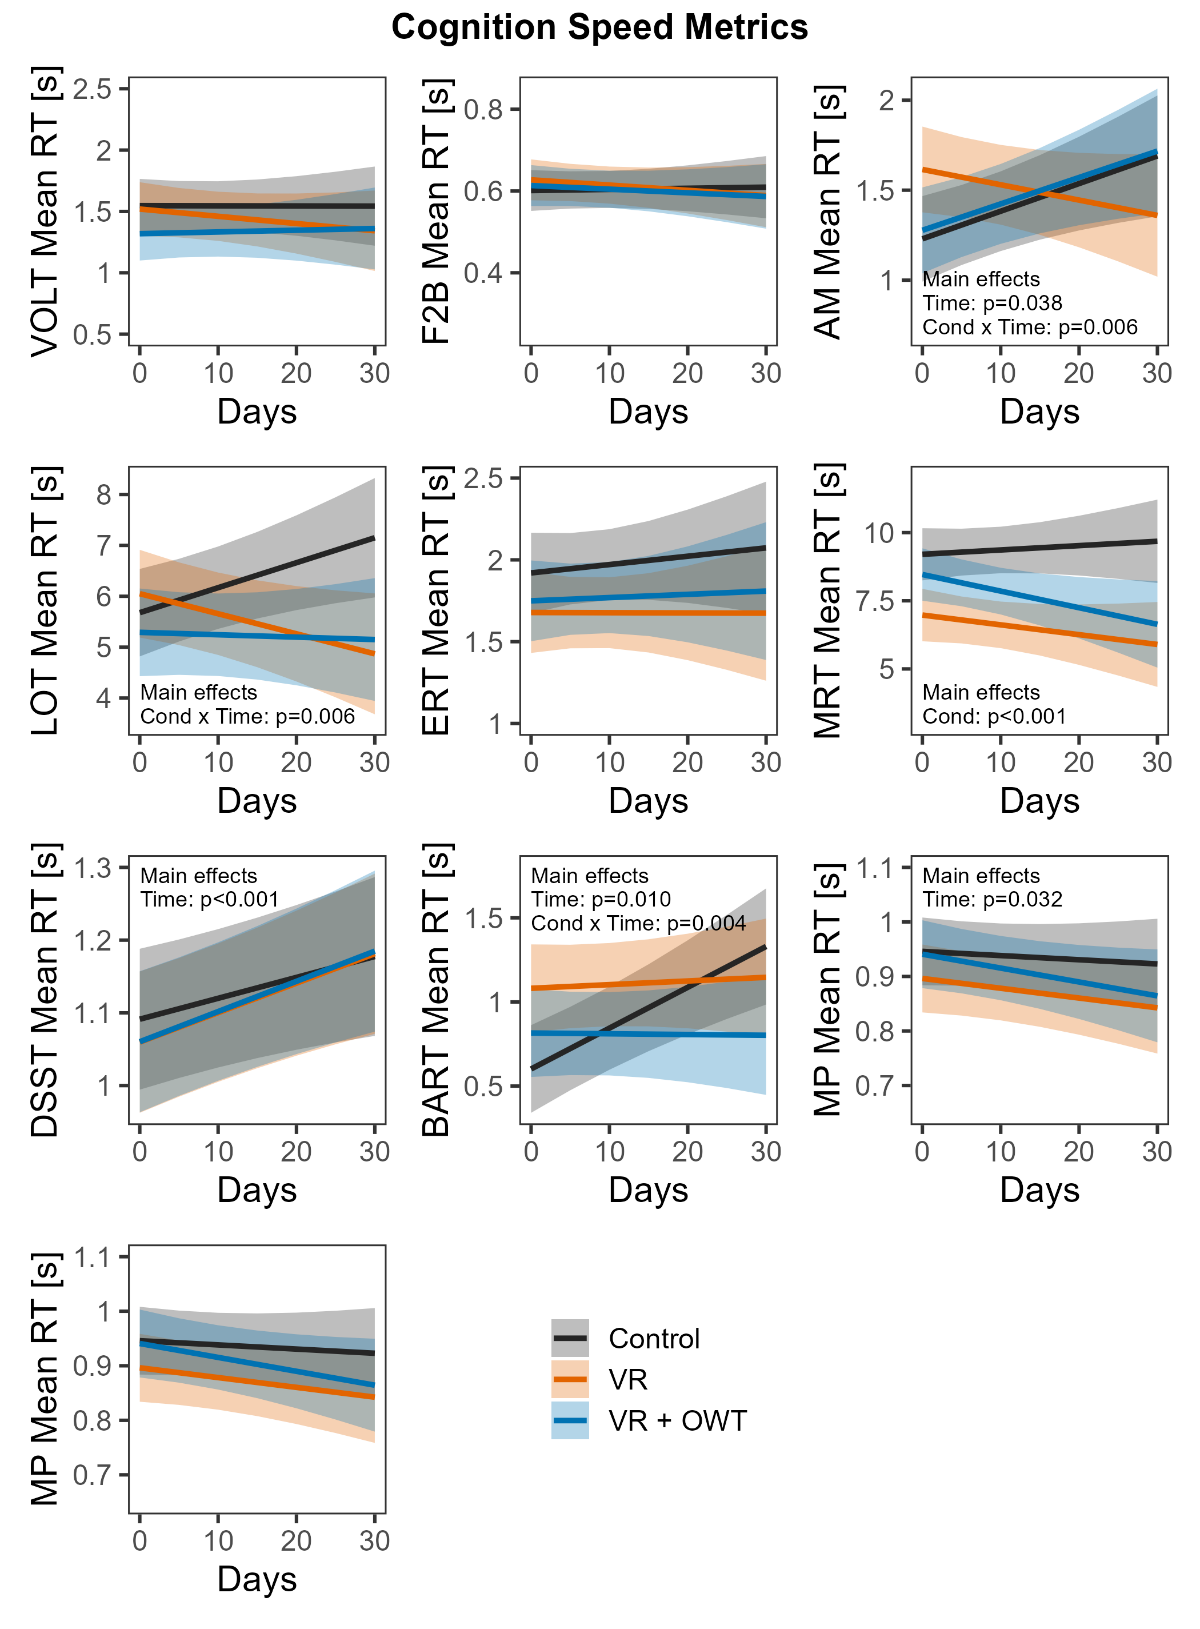


Supplementary Figure 2: Linear and robust linear mixed models for speed metrics on the ten tasks in the Cognition battery. Models are presented as predicted mean ± 95% confidence interval. Fixed factors included Time [numeric: days since T1], Condition [categorical: Control, VR, OVR], and their interaction. Subjects were included as random factors. VOLT: Visual Object Learning Test; F2B: Fractal 2-Back; AM: Abstract Matching; LOT: Line Orientation Test; ERT: Emotion Recognition Task; MRT: Matrix Reasoning Test; DSST: Digit Symbol Substitution Task; BART: Balloon Analog Risk Test; PVT: Psychomotor Vigilance Test; MP: Motor Praxis.

Supplementary Table 1: Descriptions of the 10 tasks in the Cognition battery in the order of administration.

| **Task** | **Description** |
| --- | --- |
| Motor Praxis (MP) | Subjects clicked on squares (n=20) that appeared randomly on the screen. The size of each subsequent square decreased. |
| Visual Object Learning (VOLT) | Subjects were asked to memorize 10 sequentially displayed 3-D figures. Next, they were asked to identify the objects they had memorized from a group of 20 similar objects (sequentially presented), half of them from the learning set and half of them new. |
| Fractal 2-Back (F2B) | Subjects were presented with a series of sequential figures (fractals, n=62) and asked to respond when the current stimulus matched the stimulus displayed two figures ago. |
| Abstract Matching (AM) | Subjects were presented with two pairs of objects, differing in perceptual dimensions (e.g., color and shape). Subjects were presented a target object (n=30) they had to classify as belonging more to one of the two pairs based on a set of implicit, abstract rules. |
| Line Orientation (LOT) | Subjects were presented with two lines (n=12 pairs), one stationary and one movable by clicking an arrow. Subjects were asked to rotate the movable line until the perceived it to be parallel with the stationary line. |
| Emotion Recognition (ERT) | Subjects were asked to label photographs of professional actors with different facial expressions as “happy”, “sad”, “angry”, “fearful”, or “no emotion”. There were 40 total stimuli, 8 of each emotion category. |
| Matrix Reasoning (MRT) | Subjects were shown a series of patterns overlaid on a grid with one grid element missing. Subjects then selected the element that fit the pattern from a set of alternative options. There were 12 stimuli total. |
| Digit Symbol Substitution (DSST) | Subjects were shown 1 of 9 symbols, each corresponding to a specific digit displayed in a legend, at a time and asked to select the correct number as quickly as possible. The test duration was fixed at 90 seconds. |
| Balloon Analog Risk (BART) | Subjects could inflate an animated balloon or stop inflating and collect a reward proportional to the size of the balloon. If a balloon popped, no reward was granted for that stimulus. The average tendency for a set of balloons (n=30/set) systematically differed between test administrations. |
| Psychomotor Vigilance (PVT) | Subjects were asked to monitor a box on the screen and press the spacebar as quickly as possible once a millisecond counter appeared in the box. This was a 3-minute PVT with 2 to 5 second interstimulus intervals. |
